# Supplementary material for: Checkpoint Kinase 2 Negatively Regulates Androgen Sensitivity and Prostate Cancer Cell Growth
Source: Oxford University Press journal article supplement (doi:10.1158/0008-5472.can-15-0224), 2015-11-16
Supplement: 00085472can150224-sup-144313_1_supp_0_nvwstf.docx [file 00085472can150224-sup-144313_1_supp_0_nvwstf.docx]

**Supplemental Figure S1**. Primer sequences. (A) CHK2 primers for cloning full-length CHK2 were designed based on the alignment of human CHK2 sequence obtained from Genbank (B) Real-time PCR primers. Indicated Sybr Green primers were designed using Beacon Designer Software (PREMIER Biosoft, Palo Alto, CA). (C) Candidate ARE primers for the CHK2 promoter.
